# Supplementary material for: Improving the photoelectrocatalytic efficiency of CuWO4 through molybdenum for tungsten substitution and coupling with BiVO4
Source: Royal Society of Chemistry journal article supplement (doi:10.1039/d4se00161c), 2024-01-01
Supplement: d4se00161c1.pdf [file d4se00161c1.pdf]

## Electronic Supplementary Information

### Improving the photoelectrocatalytic efficiency of $\text{CuWO}_4$ through molybdenum for tungsten substitution and coupling with $\text{BiVO}_4$

Annalisa Polo,<sup>a</sup> Maria Vittoria Dozzi,<sup>\*a</sup> Gianluigi Marra,<sup>b</sup> Kevin Sivula<sup>c</sup> and Elena Selli<sup>a</sup>

<sup>a</sup>Dipartimento di Chimica, Università degli Studi di Milano, Via Golgi 19, 20133 Milano, Italy. E-mail: mariavittoria.dozzi@unimi.it

<sup>b</sup>Eni S.p.A Novara Laboratories (NOLAB), Renewable, New Energies and Material Science Research Center (DE-R&D), via G. Fauser 4, I-28100 Novara, Italy

<sup>c</sup>Laboratory for Molecular Engineering of Optoelectronic Nanomaterials, École Polytechnique Fédérale de Lausanne (EPFL), 1015 Lausanne, Switzerland

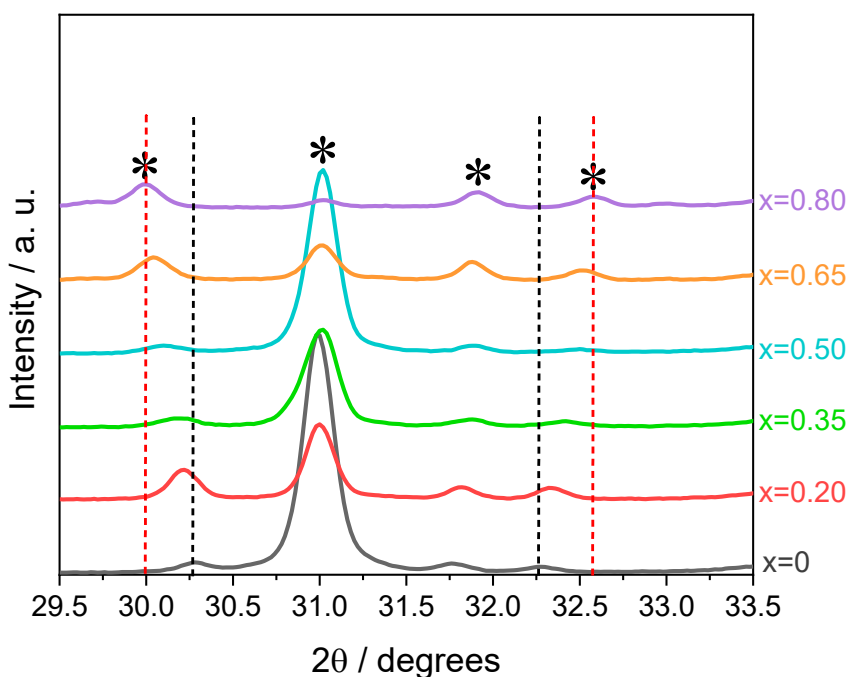

**Fig. S1** Detailed view, in the  $29.5^\circ - 33.5^\circ$   $2\theta$  range, of the XRD patterns of  $\text{CuW}_{1-x}\text{Mo}_x\text{O}_4$  electrodes ( $x = 0 - 0.8$ ). The asterisks mark the wolframite structure peaks. Wolframite peaks undergo a progressive shift with increasing  $x$  value, starting from pure  $\text{CuWO}_4$  (black dashed lines) to  $\text{CuW}_{1-x}\text{Mo}_x\text{O}_4$  with  $x = 0.8$  (red dashed lines).

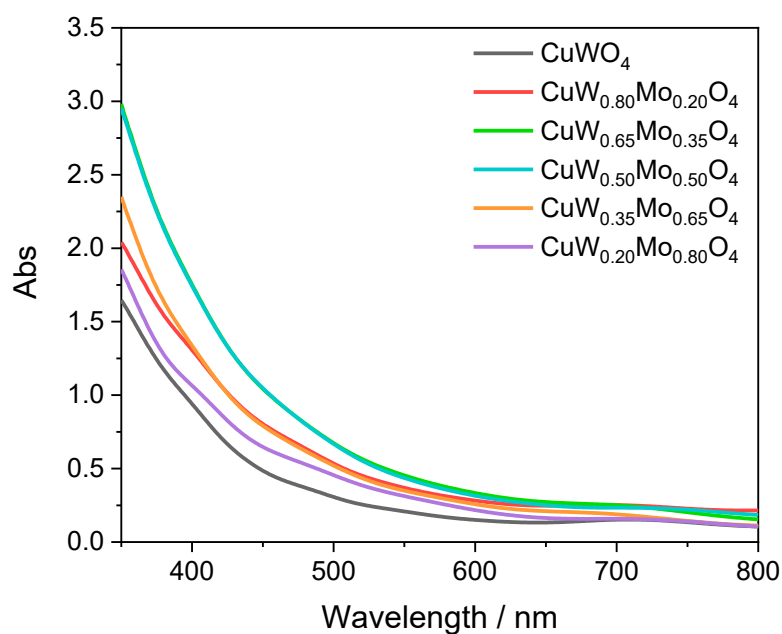

**Fig. S2** Absorption spectra of the CuW<sub>1-x</sub>Mo<sub>x</sub>O<sub>4</sub> films with different Mo<sup>6+</sup> for W<sup>6+</sup> percent substitution.

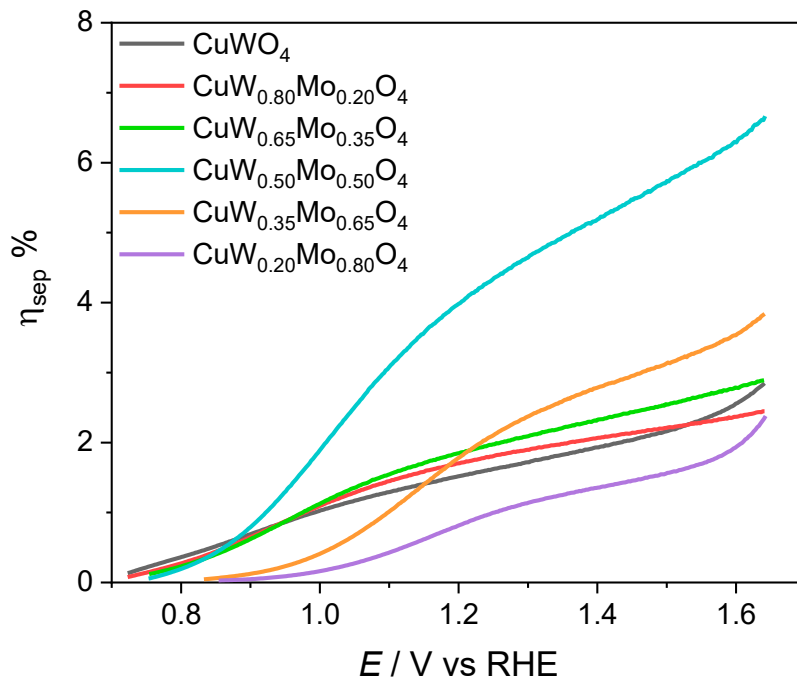

**Fig. S3**  $\eta_{\text{sep}}$  of CuW<sub>1-x</sub>Mo<sub>x</sub>O<sub>4</sub> films with different Mo<sup>6+</sup> for W<sup>6+</sup> substitution degrees, under back-side irradiation (see Section S2 below).

## S1 Absorption coefficient ( $\alpha$ ) and absorption depth ( $\delta$ ) calculation

From the absorbance at 420 nm and the thickness of multilayer  $\text{CuW}_{0.5}\text{Mo}_{0.5}\text{O}_4$  electrodes, the absorption coefficient ( $\alpha$ ) of the material at this wavelength was calculated from the Lambert Beer law according to Eq. S1:

$$\alpha = \frac{1}{h} 2.303 A \quad (\text{S1})$$

where  $h$  is the thickness of the film and  $A$  is the absorbance at the specific wavelength. We obtained  $\alpha = 7 \times 10^3 \text{ nm}^{-1}$  at 420 nm.<sup>1</sup> The absorption depth ( $\delta$ ) of the investigated materials, *i.e.*, the  $\text{CuW}_{0.5}\text{Mo}_{0.5}\text{O}_4$  film thickness ensuring 96%, 83% or 63% absorption of 420 nm incident light, calculated as  $\delta = 3 \alpha^{-1}$ ,  $\delta = 2 \alpha^{-1}$  and  $\delta = \alpha^{-1}$ , respectively,<sup>2</sup> are reported in Table S1.

**Table S1** Calculated penetration depths  $\delta$  of the  $\text{CuW}_{0.5}\text{Mo}_{0.5}\text{O}_4$  1L material ensuring 96%, 83% or 63% absorption of the incident light at 420 nm.

| Percentage of 420 nm light absorbed | $\delta$ / nm |
|-------------------------------------|---------------|
| 63% ( $1 \times \alpha^{-1}$ )      | 144           |
| 83% ( $2 \times \alpha^{-1}$ )      | 289           |
| 96% ( $3 \times \alpha^{-1}$ )      | 433           |

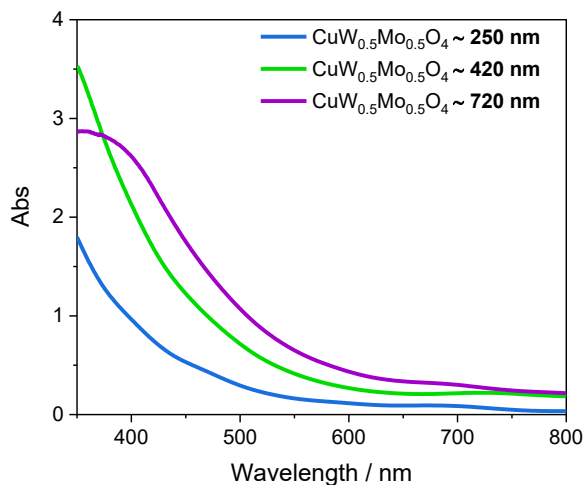

**Fig. S4** Absorption spectra of  $\text{CuW}_{0.5}\text{Mo}_{0.5}\text{O}_4$  1L,  $\text{CuW}_{0.5}\text{Mo}_{0.5}\text{O}_4$  2L and  $\text{CuW}_{0.5}\text{Mo}_{0.5}\text{O}_4$  3L.

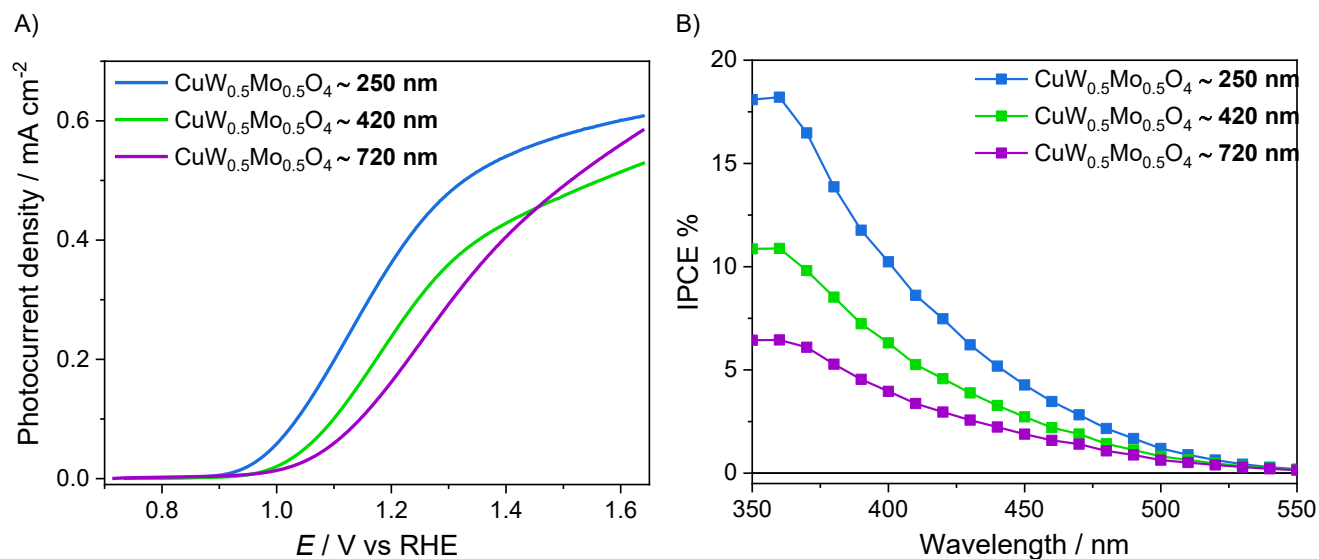

**Fig. S5** (A) Linear sweep voltammetry (LSV) scans and (B) incident photon to current efficiency (IPCE) plots recorded at 1.23  $V_{RHE}$  with differently thick CuW<sub>0.5</sub>Mo<sub>0.5</sub>O<sub>4</sub> electrodes (blue 1L, green 2L and violet 3L) under back-side irradiation.

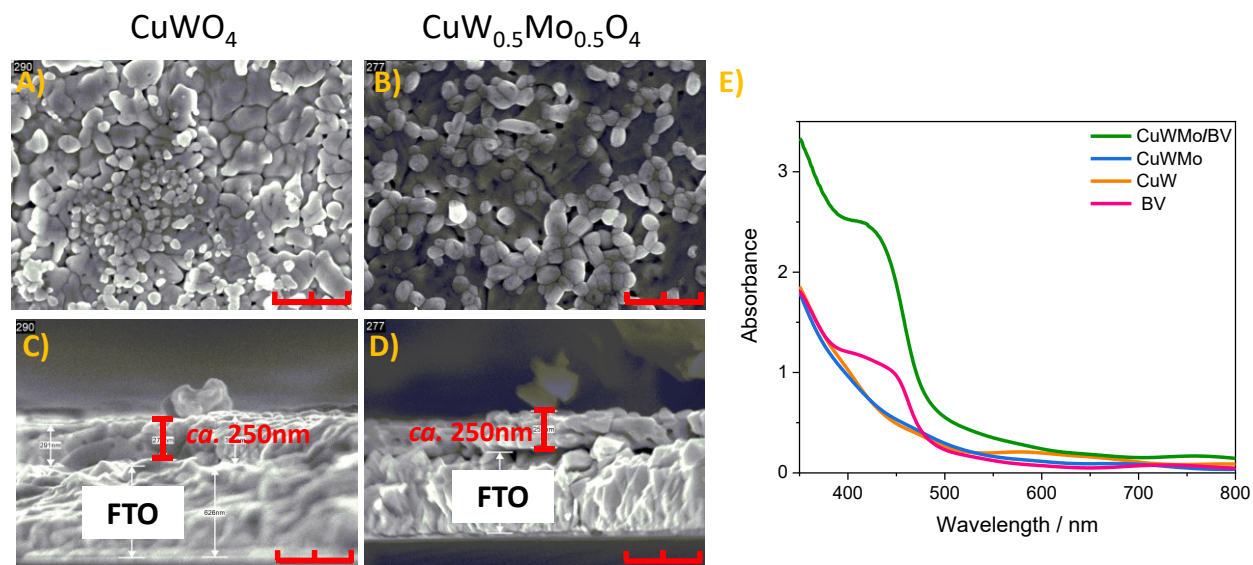

**Fig. S6** (A,B) Top view and (C,D) side view SEM images at 50kx magnification of (A,C) CuW and (B,D) CuWMo, with a 500 nm scale bar. (E) Absorption spectra of CuW (orange), CuWMo (blue), BV (magenta) and CuWMo/BV (green).

## S2 $\eta_{\text{sep}}$ and $\eta_{\text{inj}}$ calculation from LSV measurements in the presence of $\text{NaNO}_2$ as hole scavenger

We evaluated the charge separation efficiency in the bulk ( $\eta_{\text{sep}}$ ), that is the fraction of photogenerated holes that successfully reach the electrode/electrolyte interface without recombining with electrons in the bulk, and the charge injection efficiency at the film/electrolyte interface ( $\eta_{\text{inj}}$ ), *i.e.*, the fraction of photogenerated holes that, upon reaching the electrode/electrolyte interface, are successfully injected into the electrolyte.  $\text{NaNO}_2$  was employed as hole scavenger for copper tungstate materials,<sup>3</sup> and LSV measurements performed in contact with either a  $\text{K}_3\text{BO}_3$  buffered solution ( $J_{\text{K}_3\text{BO}_3}$ ), or the buffered solution also containing  $\text{NaNO}_2$  ( $J_{\text{NaNO}_2}$ ), under the assumption that no charge accumulation occurs at the semiconductor-liquid junction.<sup>4</sup> The injection efficiency was determined as  $\eta_{\text{inj}} = J_{\text{K}_3\text{BO}_3}/J_{\text{NaNO}_2}$  and the separation efficiency was calculated as  $\eta_{\text{sep}} = J_{\text{NaNO}_2}/J_{\text{abs}}$ ,  $J_{\text{abs}}$  being the theoretical maximum photocurrent density of the material, corresponding to 100% conversion of the absorbed photons into photocurrent, which can be calculated from the integration of the absorption spectrum of the photoactive material over the AM 1.5 G solar spectrum. The calculated  $\eta_{\text{inj}}$  and  $\eta_{\text{sep}}$  are usually plotted as a function of the applied potential.

## S3 Intensity modulated photocurrent spectroscopy (IMPS) measurements

The IMPS response in Fig. S6 was fit to a proper phenomenological model,<sup>5,6</sup> according to the following equation:<sup>7</sup>

$$J(\omega) = \frac{J_h}{1 + (i\omega\tau_h)^{\alpha_1}} - \frac{J_r}{1 + (i\omega\tau_r)^{\alpha_2}} \quad (\text{S2})$$

From the fit model, the following parameters can be calculated:  $J_h$ , the flux of holes arriving to the SCLJ and available for water oxidation;  $J_r$ , the flux of holes that are lost due to recombination at the film surface; and the two time constants  $\tau_h$ , for bulk hole current, and  $\tau_r$ , for surface recombination.  $\alpha_1$  and  $\alpha_2$

are the non-ideality factors used to describe the deformation of the semicircles due to the frequency dependence of the dielectric constant.

In this way, an accurate evaluation of the  $\eta_{sep}$  and  $\eta_{inj}$  parameters *in operando* can be obtained as  $\eta_{sep} = J_h/J_{abs}$  (where  $J_{abs}$  is the maximum photocurrent expected for each examined photoanode based on its absorption spectrum) and  $\eta_{inj} = (J_h - J_r)/J_h$ .

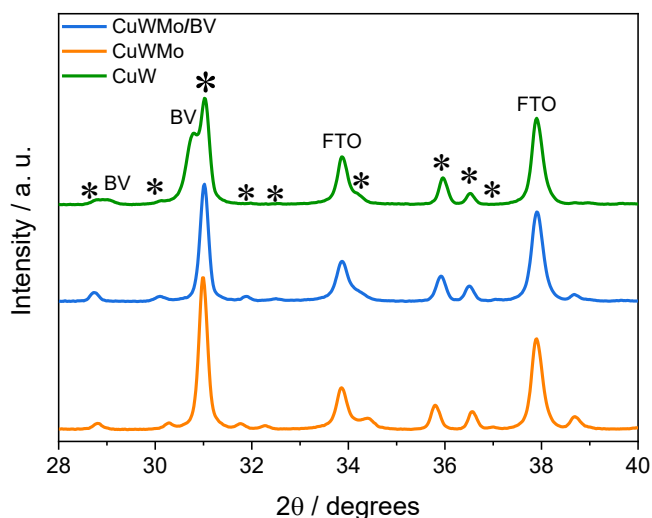

**Fig. S7** (A) XRD patterns in the 28° to 40° 2θ region of CuW, CuWMo and CuWMo/BV films. The  $CuW_{0.5}Mo_{0.5}O_4$  wolframite reflections are marked with an asterisk. FTO and  $BiVO_4$  (BV) reflections are also indicated.

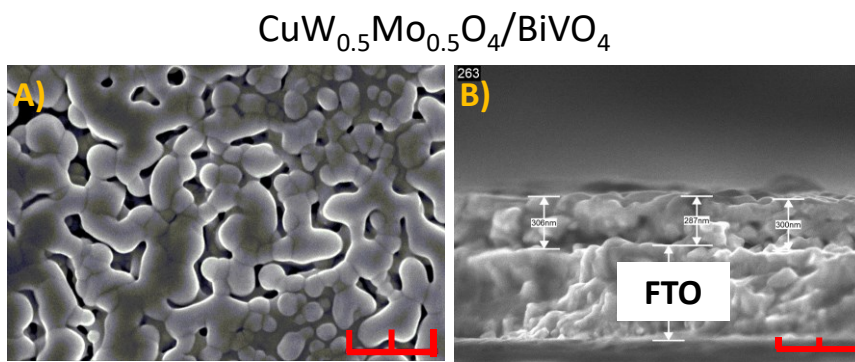

**Fig. S8** (A) Top and (B) side view SEM images at 50kx magnification of  $CuW_{0.5}Mo_{0.5}O_4/BiVO_4$  heterojunction electrode. The scale bar is 500 nm.

## References

- 1 W. Q. Hong, *J. Phys. D. Appl. Phys.*, 1989, **22**, 1384–1385.
- 2 S. Murcia-López, C. Fàbrega, D. Monllor-Satoca, M. D. Hernández-Alonso, G. Penelas-Pérez, A. Morata, J. R. Morante and T. Andreu, *ACS Appl. Mater. Interfaces*, 2016, **8**, 4076–4085.
- 3 A. Polo, C. Nomellini, I. Grigioni, M. V. Dozzi and E. Selli, *ACS Appl. Energy Mater.*, 2020, **3**, 6956–6964.
- 4 H. Dotan, K. Sivula, M. Grätzel, A. Rothschild and S. C. Warren, *Energy Environ. Sci.*, 2011, **4**, 958–964.
- 5 D. Klotz, D. S. Ellis, H. Dotan and A. Rothschild, *Phys. Chem. Chem. Phys.*, 2016, **18**, 23438–23457.
- 6 D. Klotz, D. A. Grave and A. Rothschild, *Phys. Chem. Chem. Phys.*, 2017, **19**, 20383–20392.
- 7 F. Boudoire, Y. Liu, F. Le Formal, N. Guijarro, C. R. Lhermitte and K. Sivula, *J. Phys. Chem. C*, 2021, **125**, 10883–10890.
